# Supplementary material for: Comparative Genomics of Leuconostoc carnosum
Source: Front Microbiol. 2021 Jan 11;11:605127. doi: 10.3389/fmicb.2020.605127 (PMC7829361; doi:10.3389/fmicb.2020.605127)
Supplement: Supplementary file 3 [file Data_Sheet_2.XLSX]

## Sheet: Transporters
Supplementary datasheet 2 Reconstructed transporters, according to KEGGS mapper annotation.
Complete transporters are in green, incomplete transporters are in yellow, missing transporters are white
			Pangenome	Core genome	WC0318	WC0319	WC0320	WC0321	WC0322	WC0323	WC0324	WC0325	WC0326	WC0327	WC0328	WC0329	JB16	CBA3620	MFPC16A2803	MFPA29A1405	DSM5576T
ABC transporter	Prokaryotic type	arginine/lysine/histidine	+	+	+	+	+	+	+	+	+	+	+	+	+	+	+	+	+	+	+
ABC transporter	Prokaryotic type	aspartate/glutamate/glutamine	+	+	+	+	+	+	+	+	+	+	+	+	+	+	+	+	+	+	+
ABC transporter	Prokaryotic type	biotin (energy-coupling factor)	+	+	+	+	+	+	+	+	+	+	+	+	+	+	+	+	+	+	+
ABC transporter	Prokaryotic type	branched-chain amino acid	+	+	+	+	+	+	+	+	+	+	+	+	+	+	+	+	+	+	+
ABC transporter	Prokaryotic type	D-methionine	+	+	+	+	+	+	+	+	+	+	+	+	+	+	+	+	+	+	+
ABC transporter	Prokaryotic type	general nucleoside	+	+	+	+	+	+	+	+	+	+	+	+	+	+	+	+	+	+	+
ABC transporter	Prokaryotic type	glutamine	+	+	+	+	+	+	+	+	+	+	+	+	+	+	+	+	+	+	+
ABC transporter	Prokaryotic type	glycine betaine/proline	+	+	+	+	+	+	+	+	+	+	+	+	+	+	+	+	+	+	+
ABC transporter	Prokaryotic type	L-cystine	+	+	+	+	+	+	+	+	+	+	+	+	+	+	+	+	+	+	+
ABC transporter	Prokaryotic type	lipooligosaccharide	+	–	+	–	+	+	+	+	–	+	+	+	+	+	+	–	+	+	–
ABC transporter	Prokaryotic type	manganese	+	+	+	+	+	+	+	+	+	+	+	+	+	+	+	+	+	+	+
ABC transporter	Prokaryotic type	oligopeptide	+	+	+	+	+	+	+	+	+	+	+	+	+	+	+	+	+	+	+
ABC transporter	Prokaryotic type	osmoprotectant	+	–	+	–	–	+	–	+	–	+	+	+	+	–	+	–	+	–	+
ABC transporter	Prokaryotic type	phosphate	+	+	+	+	+	+	+	+	+	+	+	+	+	+	+	+	+	+	+
ABC transporter	Prokaryotic type	phosphonate	+	+	+	+	+	+	+	+	+	+	+	+	+	+	+	+	+	+	+
ABC transporter	Prokaryotic type	ribose xylose	+	+	+	+	+	+	+	+	+	+	+	+	+	+	+	+	+	+	+
ABC transporter	Prokaryotic type	spermidine/putrescine	+	+	+	+	+	+	+	+	+	+	+	+	+	+	+	+	+	+	+
ABC transporter	Prokaryotic type	teichoic acid	+	+	+	+	+	+	+	+	+	+	+	+	+	+	+	+	+	+	+
ABC transporter	Eukaryotic type	ABCB subfamily, mdlAB (multidrug efflux)	+	+	+	+	+	+	+	+	+	+	+	+	+	+	+	+	+	+	+
ABC transporter	Eukaryotic type	ABCB subfamily, lmrCD (multidrug efflux)	+	+	+	+	+	+	+	+	+	+	+	+	+	+	+	+	+	+	+
ABC transporter	Eukaryotic type	ABCC subfamily, CydDC (cytochrome assembly)	+	+	+	+	+	+	+	+	+	+	+	+	+	+	+	+	+	+	+
ABC transporter	Eukaryotic type	ABCC subfamily, BlpA (bacteriocin exporter)	+	–	+	–	+	+	+	+	–	+	+	+	+	+	–	–	+	+	–
PTS		PTS EI PEP-protein phosphotransferase	+	+	+	+	+	+	+	+	+	+	+	+	+	+	+	+	+	+	+
PTS		PTS phosphocarrier protein HPr	+	+	+	+	+	+	+	+	+	+	+	+	+	+	+	+	+	+	+
PTS	Fru family	fructose	+	–	–	–	–	–	–	–	–	–	+	+	–	–	–	–	–	–	–
PTS	Gat family	galactitol	+	–	+	+	–	+	+	+	+	+	–	–	+	+	+	+	+	+	+
PTS	Glc family	beta-glucoside	+	+	+	+	+	+	+	+	+	+	+	+	+	+	+	+	+	+	+
PTS	Glc family	sucrose	+	+	+	+	+	+	+	+	+	+	+	+	+	+	+	+	+	+	+
PTS	Glc family	glucose, maltose, alpha-glucoside, trahalose, N-acetyl muramic acid (Ú, only EIIA component, Crr)	Ú	–	–	–	–	–	–	–	–	–	–	–	Ú	–	Ú	–	–	–	–
PTS	Lac family	cellobiose / diacetyl chitobiose	+	+	+	+	+	+	+	+	+	+	+	+	+	+	+	+	+	+	+
PTS	L-Asc family	ascorbate	+	–	–	+	–	–	–	–	+	–	–	–	+	–	+	+	–	–	–
PTS	Man family	mannose	+	+	+	+	+	+	+	+	+	+	+	+	+	+	+	+	+	+	+
PTS	Man family	N-acetylgalactosamine, galactosamine (Ú, only EIIA component AgaF)	Ú	Ú	Ú	Ú	Ú	Ú	Ú	Ú	Ú	Ú	Ú	Ú	Ú	Ú	Ú	Ú	Ú	Ú	Ú
PTS	Nitrogen regulation	nitrogen (Ú, only EIIA component, PtsN)	Ú	–	Ú	Ú	–	Ú	Ú	Ú	Ú	Ú	–	–	Ú	Ú	Ú	Ú	Ú	Ú	Ú
